# Supplementary material for: Participation in a pre-registration student interprofessional education (IPE) society: influence on subsequent professional practice
Source: Frontiers journal article supplement (doi:10.3389/fmed.2024.1497799), 2025-01-28
Supplement: Data_Sheet_1.pdf [file Data_Sheet_1.pdf]

## Appendix 1

### Examples of student interprofessional education societies

| <b>IPE Student Healthcare Organisation</b>                                                | <b>Weblinks [Accessed 21.12.2024]</b>                                                                                                                                                                                                                        |
|-------------------------------------------------------------------------------------------|--------------------------------------------------------------------------------------------------------------------------------------------------------------------------------------------------------------------------------------------------------------|
| London Interprofessional Healthcare students association (LIHSA), Ontario, Canada.        | <a href="https://www.facebook.com/LondonIHSA/">https://www.facebook.com/LondonIHSA/</a>                                                                                                                                                                      |
| Robert Gordon University (RGU) student IPE society, UK.                                   | <a href="https://www.rgu.ac.uk/rgview/student-experience/3309-getting-involved-in-interprofessional-education">https://www.rgu.ac.uk/rgview/student-experience/3309-getting-involved-in-interprofessional-education</a>                                      |
| The Interprofessional Health Student Organizations (IPSO), United States.                 | <a href="https://www.marshall.edu/interprofessional-education/student-organization/">https://www.marshall.edu/interprofessional-education/student-organization/</a>                                                                                          |
| The World Health Students' Alliance (WHSA).                                               | <a href="https://ifmsa.org/world-health-students-alliance/">https://ifmsa.org/world-health-students-alliance/</a>                                                                                                                                            |
| University of Toronto Interprofessional Healthcare Students' Association (IPHSA), Canada. | <a href="https://ipe.utoronto.ca/interprofessional-healthcare-students-association-iphsa">https://ipe.utoronto.ca/interprofessional-healthcare-students-association-iphsa</a><br><a href="https://iphsaip.ee.weebly.com/">https://iphsaip.ee.weebly.com/</a> |
| University of Birmingham student IPE society, UK.                                         | <a href="https://www.instagram.com/uob_ipesoc/">https://www.instagram.com/uob_ipesoc/</a>                                                                                                                                                                    |
| University of Cardiff IPE student society, UK.                                            | <a href="https://www.facebook.com/CUIPESociety/">https://www.facebook.com/CUIPESociety/</a>                                                                                                                                                                  |
| University of East Anglia (UEA) IPE student society, UK.                                  | <a href="https://www.facebook.com/ueaipesoc/?locale=en_GB">https://www.facebook.com/ueaipesoc/?locale=en_GB</a>                                                                                                                                              |
